# Supplementary material for: Hippocampal and Subcortical Alterations of First-Episode, Medication-Naïve Major Depressive Disorder With Panic Disorder Patients
Source: Atypon-hosted journal article supplement (doi:10.1176/appi.neuropsych.12090230), 2014-02-10
Supplement: 142_ds001.pdf [file 142_ds001.pdf]

Supplementary figures

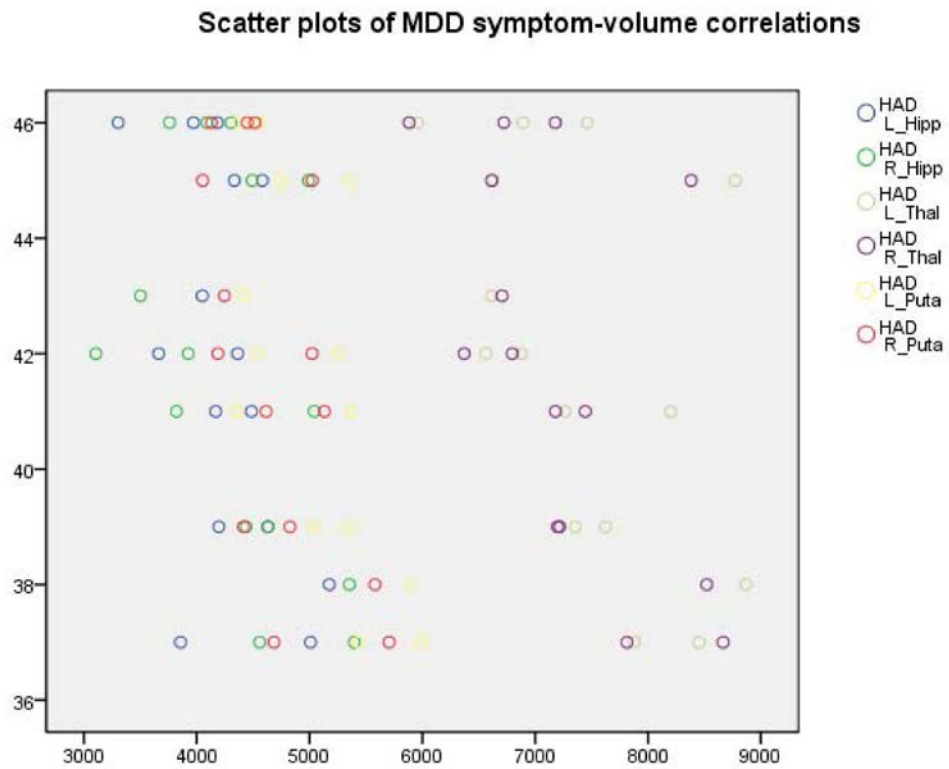

Supplementary Figure 1: Scatter plots of the correlations between HAD scores (Y axis) and volumes of subcortical structures and hippocampus (X axis) (Abbreviations: L\_Hipp: left hippocampus, R\_Hipp: right hippocampus, L\_Thal: left thalamus, R\_Thal: right thalamus, L\_Puta: left putamen, R\_Puta: right putamen)

### Scatter plots of PD symptom-volume correlations

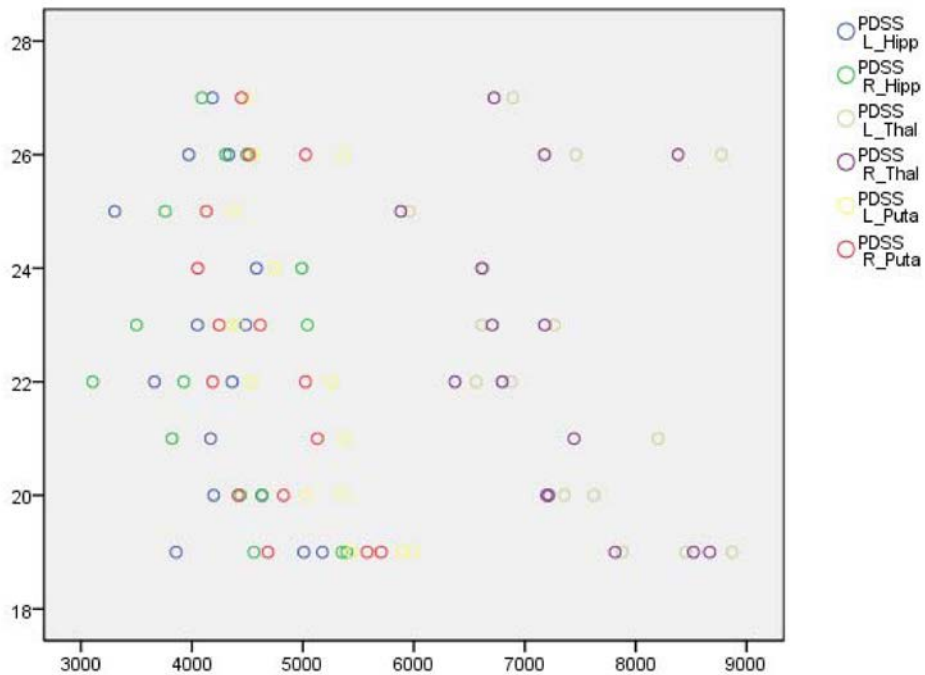

Supplementary Figure 2: Scatter plots of the correlations between PDSS scores (Y axis) and volumes of subcortical structures and hippocampus (X axis) (Abbreviations: L\_Hipp: left hippocampus, R\_Hipp: right hippocampus, L\_Thal: left thalamus, R\_Thal: right thalamus, L\_Puta: left putamen, R\_Puta: right putamen)
